# Supplementary material for: CSF and blood Kallikrein-8: a promising early biomarker for Alzheimer’s disease
Source: PubMed Central journal article supplement — J Neurol Neurosurg Psychiatry. 2019 Aug 1;91(1):40–8. doi: 10.1136/jnnp-2019-321073 (PMC6952834; doi:10.1136/jnnp-2019-321073), 2019-08-01
Supplement: jnnp-2019-321073supp001.pdf [file jnnp-2019-321073supp001.pdf]

1 **SUPPLEMENTARY DATA**

2

3 **SUPPLEMENTARY METHODS**

4 **Blood and CSF sampling**

5 Blood samples from all participants (n for AD=98, MCI=21, control=118) and CSF samples  
6 from subgroups of participants (n for AD=40, MCI=12, control=35) were collected locally at  
7 each study site *via* vein/lumbar puncture under non-fasting conditions; the latter was  
8 performed with either a “Quincke needle” (BD Diagnostics, Franklin Lakes, NJ) or “Sprotte  
9 cannula” (Pajunk, Geislingen, Germany) in a seated position. CSF was collected in a  
10 polypropylene CSF tube and blood in serum monovettes without clotting activator (each from  
11 Sarstedt, Nümbrecht, Germany). CSF and blood samples (the latter after 45 minutes of  
12 coagulation) were centrifuged at 20°C for 10 min after collection at 2000 g (study groups B, C  
13 and D) or at 3500 g (study group A). The supernatants were aliquoted in polypropylene tubes  
14 (“Matrix tubes”, Thermo Fisher Scientific, Waltham, MA, USA) and stored at -80°C until  
15 further measurements; multiple freeze/thaw cycles were avoided. Notably, the sample  
16 storage length differed in particular between the study group B and the other ones (study  
17 group B: 7 months (4-10.5) and in study groups A: 44 months (38-47), C: 59 months (20-73)  
18 and D: 29 months (25-39)). However, there were no noteworthy variations in sample  
19 collection period or storage duration between different diagnostic groups within each study  
20 group/site.

21

22 **CSF A $\beta$ <sub>42</sub> and T-/P-tau measurements and APOE genotyping**

23 A $\beta$ <sub>42</sub>, A $\beta$ <sub>40</sub> and P-/T-tau levels were assessed locally at the three above named clinical sites  
24 as part of clinical routine diagnostics *via* enzyme-linked immunosorbent (ELISA) assays  
25 (INNOTEST  $\beta$ -Amyloid<sub>1-42</sub> #FRI14358, INNOTEST hTau Ag #FRI99021, INNOTEST  
26 Phospho-Tau<sub>(181P)</sub> #FRI31928, all from Fujirebio Gent, Belgium; Amyloid-beta (1-40) High  
27 sensitive ELISA, #RE59781, IBL international GmbH, Hamburg, Germany). Cut-off levels  
28 were defined by their laboratories and adapted to their standard procedures. The cut-off

1 levels were defined as >450 pg/ml for T-tau, >61 pg/ml for P-tau and <450 pg/ml for A $\beta$ <sub>42</sub> in  
2 study groups A & B and >300 pg/ml for T-tau and <550 pg/ml for A $\beta$ <sub>42</sub> in study group C. The  
3 pathological range for the A $\beta$ <sub>42</sub>/A $\beta$ <sub>40</sub> ratio was defined as <0.5 ((A $\beta$ <sub>42</sub>/A $\beta$ <sub>40</sub>) x 10). APOE  
4 genotypes (gene map locus 19q13) were determined also locally at the above named  
5 centers *via* polymerase chain reaction (PCR).

6

#### 7 **KLK8 measurement in CSF and blood**

8 All KLK8 measurements were performed in the central reference laboratory at the Institute of  
9 Neuropathology, University of Duisburg-Essen. Analyses were performed by an experienced  
10 technician who was blinded to participants' diagnoses. KLK8 levels were measured in  
11 duplicate using a commercially obtained ELISA kit (#EK0819, Boster Biological Technology,  
12 Pleasanton, California, USA) following the manufacturer's instructions. For the entire  
13 measurements two different lots of ELISA kits were used; different diagnostic groups were  
14 distributed equally between assay lots. Serum samples were diluted in sample buffer (1:2  
15 dilution), whereas CSF samples remained undiluted. Agreement between the two  
16 measurements was assessed graphically using Bland-Altman plots and scatter plots  
17 (supplementary figure 1). Only very few subjects had mean KLK8 values that were outside  
18 the 95% confidence interval, implicating a high reliability of KLK8 measurement.

19 We used a commercially available ELISA assay for KLK8 measurements, which hopefully  
20 will facilitate reproducibility of our results. The technical specifications of the utilized KLK8  
21 ELISA kit are as follows: A) detection limit/sensitivity: <10 pg/ml, B) assay range: 156-10,000  
22 pg/ml, C) intra-assay variability: CV (%) = 7.6, D) inter-assay variability: CV (%) = 8.1, E)  
23 reproducibility: CV (%) = 4.1. Specificity of this assay was verified by spiking of KLK6 (the  
24 most abundant kallikrein in adult CNS<sup>1</sup>) or KLK8 into the sample matrix, showing that  
25 addition of KLK8 strongly increased absorbance levels, whereas even high concentrations of  
26 KLK6 were effectless (data not shown).

27

28

1

2 **SUPPLEMENTARY TABLES**

3

|                                 | CSF KLK8              | Blood KLK8 4          |
|---------------------------------|-----------------------|-----------------------|
| <b>Mean <math>\pm</math>SEM</b> | 272.49 ( $\pm$ 15.06) | 518.39 ( $\pm$ 54.38) |
| <b>Median</b>                   | 249.94                | 301.36                |
| <b>Q1</b>                       | 169.29                | 90.86                 |
| <b>Q3</b>                       | 357.32                | 626.60                |
| <b>IQR</b>                      | 188.03                | 535.74                |
| <b>Minimum</b>                  | 18.13                 | 0.4                   |
| <b>Maximum</b>                  | 691.13                | 9294.7                |
| <b>Skewness</b>                 | 0.50                  | 6.05                  |
| <b>Kurtosis</b>                 | 0.25                  | 53.94                 |

10

11

12

13 **Supplementary Table S1: Distributional characteristics of KLK8**

14 Abbreviations: CSF, cerebrospinal fluid; SEM, standard error of the mean; Q1, Quartile 1;

15 Q3, Quartile 3; IQR, interquartile range.

16

17

18

19

20

21

22

23

24

25

26

1

2

3

|                          | Hodges-Lehmann estimator |                         |
|--------------------------|--------------------------|-------------------------|
|                          | CSF KLK8                 | Blood KLK8              |
| AD vs. CON               | 116.1 (71.6 – 174.2)     | 165.3 (76.8 – 267.5)    |
| AD vs. MCI               | -143.8 (-220.6 – -74.3)  | -233.1 (-899.8 – -77.1) |
| MCI vs. CON              | 268.1 (183.8 – 345.5)    | 539.7 (74.3 – 1116.1)   |
| CON Subgroups            |                          |                         |
| Healthy vs. Headache     | NA                       | 29.0 (-112.3 – 162.6)   |
| Healthy vs. Psychiatric  | NA                       | 171.9 (93.3 – 260.9)    |
| Healthy vs. PD           | NA                       | 138.6 (26.6 – 256.7)    |
| Headache vs. Psychiatric | 150.1 (94.8 – 185.6)     | 122.2 (10.5 – 298.7)    |
| Headache vs. PD          | NA                       | 58.3 (-26.7 – 295.5)    |
| Psychiatric vs. PD       | NA                       | 10.8 (-170.8 – 39.2)    |

4

#### 5 **Supplementary Table S2: Median KLK8 differences between diagnostic groups**

6 Median KLK8 differences between diagnostic groups are determined by Hodges-Lehmann  
7 estimator (with 95% confidence interval).

8 Abbreviations: AD, Alzheimer's disease; MCI, mild cognitive impairment due to AD; CON,  
9 controls; healthy, healthy volunteers; headache, patients with tension-type headache;  
10 psychiatric, patients with psychiatric diagnoses; PD, patients with Parkinson's disease; CSF,  
11 cerebrospinal fluid; NA, not applicable.

12

1 **SUPPLEMENTARY FIGURE**

2

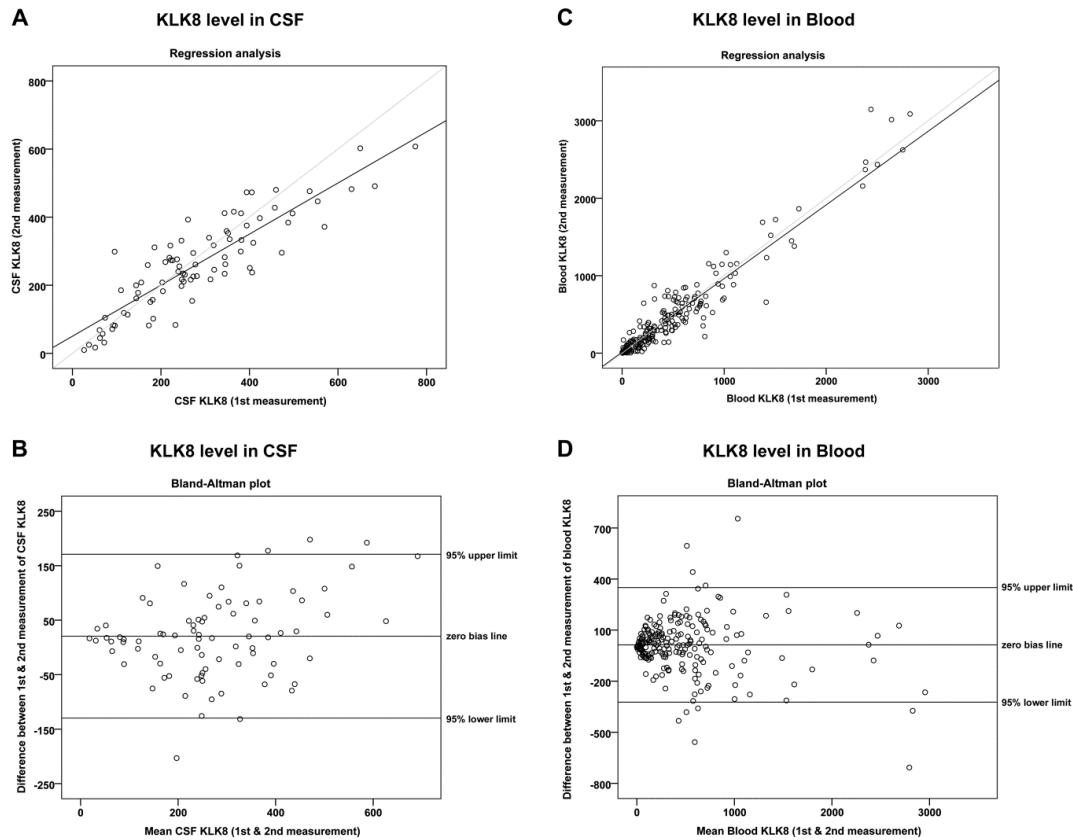

3

4 **Supplementary figure 1: Agreement of duplicate CSF and blood KLK8 measurements**

5 To compare the first and second KLK8 measurements scatter plots (A, C) and Bland-Altman  
 6 plots (B, D) in CSF (A, B) and blood (C, D) were generated. In C and D two samples with  
 7 extremely high KLK8 blood values (sample 1: mean 4775 pg/ml, measurement 1: 4710  
 8 pg/ml, measurement 2: 4840 pg/ml; and sample 2: mean 9294 pg/ml, measurement 1: 9791  
 9 pg/ml, measurement 2: 8797 pg/ml) are not shown to avoid distortion of data visualization.

10 Abbreviations: CSF, cerebrospinal fluid; KLK8, Kallikrein-8.

11

12 **SUPPLEMENTARY REFERENCES**

13 1. Shaw JL, Diamandis EP. Distribution of 15 human kallikreins in tissues and biological  
 14 fluids. *Clin Chem* 2007;**53**:1423-32. doi: 10.1373/clinchem. 2007.088104
